# Supplementary material
Source: PubMed Central journal article supplement (PMC2894258)

**Table 1.** Primer sequences used for real time PCR (3' to 5')

| <b>Gene target</b> | <b>Forward</b>          | <b>Reverse</b>              |
|--------------------|-------------------------|-----------------------------|
| Cyclophilin A      | GTGGTCTTTGGGAAGGTGAA    | TTACAGGACATTGCGAGCAG        |
| Cd11c              | CTGGATAGCCTTTCTTCTGCTG  | GCACACTGTGTCCGAACTC         |
| IL-12p40           | GGAGACACCAGCAAAACGAT    | GATTCAGACTCCAGGGGACA        |
| IFN- $\gamma$      | TCTGGAGGAACTGGCAAAAG    | TTCAAGACTTCAAAGAGTCTGAGG    |
| IL-4               | TCAACCCCCAGCTAGTTGTC    | TGTTCTTCGTTGCTGTGAGG        |
| IL-18              | CAGTGAACCCCAGACCAGAC    | GGCAAGCAAGAAAGTGCCT         |
| IL-13              | CCAGGTCCACACTCCATAACC   | TGCCAAGATCTGTGTCTCTCC       |
| RANTES             | CAGGAGCAAGTGCTCCAATCTT  | TTCTTGAACCCACTTCTTCTCTGG    |
| CD3                | AGGCACTGTAGCCCAGACAAATA | AGCCACTTGATAGTCTTGTGTCAGTCA |
| IP-10/CXCL10       | GCTGCCGTCATTTTCTGC      | TCTCACTGGCCCGTCATC          |
| MIG/CXCL9          | CTTTTCCTTTTGGGCATCAT    | CGATCGTGCATTCCCTTATCA       |
| I-A                | GTGGTGCTGATGGTGCTG      | CCATGAACTGGTACACGAAATG      |

## Supplement Figure Legends.

**Figure S-1.** Gating procedures used for FACS analyses. (a) Ungated and uncompensated plots showing forward and side scatter properties and (b) positive CD3-staining; used to define the lymphocyte (R1) gate for each SVC sample. For each experiment, matched isotype-conjugated controls were used to define non-specific background fluorescence events, which were excluded (not shown). (c) Colored gating [red for anti-CD4-PE(FL2), and blue for anti-CD8-PECy5(FL3)] indicates the positive events counted within the SVC population of the lymphocyte gate for cell surface markers of interest. Dot plots showing how single fluorescence channels were used to quantify positive events of double-and triple-stained samples. (d) CD4, (e) CD8, and (f) CD3-positive events.

**Figure S-2.** Temporal dynamics of mRNA levels of Th1-associated genes and IL-13 in whole eAT through 20 weeks of high fat diet (HFD). (a) IP-10, (b) Mig, (c) IL-18, and (d) IL-13. Data are expressed as fold change (mean  $\pm$  sem) relative to low fat diet (LFD).  $n = 3$  to  $4$ , LFD and  $n = 4$ , HFD mice at each time point. Bars identified by different letters are significantly different ( $P \leq 0.05$ ). #,  $P \leq 0.05$  for effect of time; \*,  $P \leq 0.05$  for comparison between diets at the indicated time point.

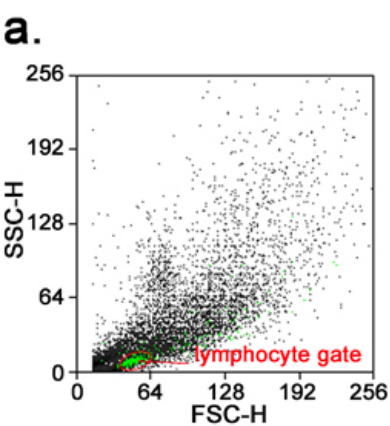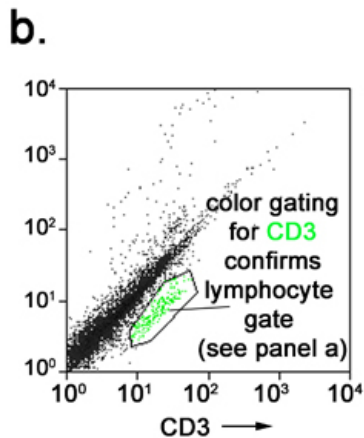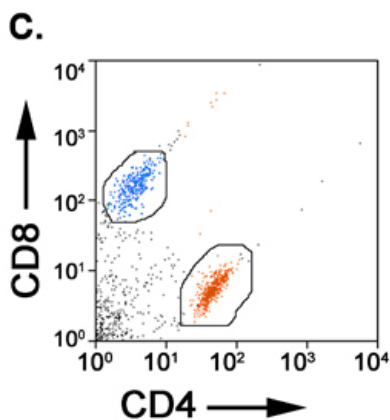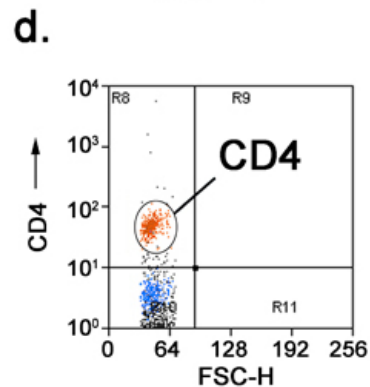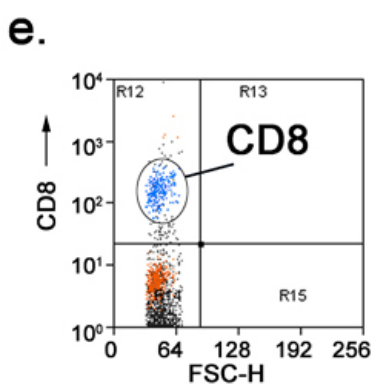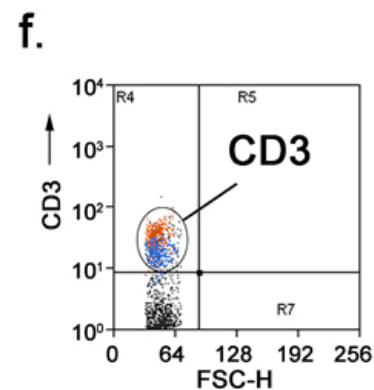

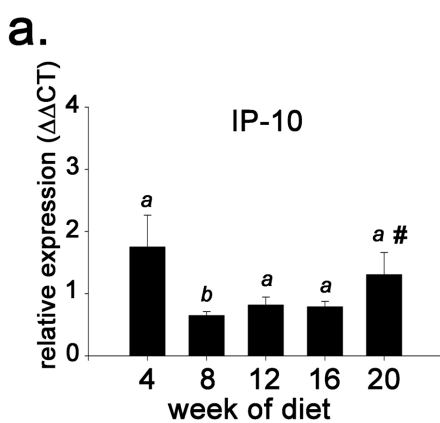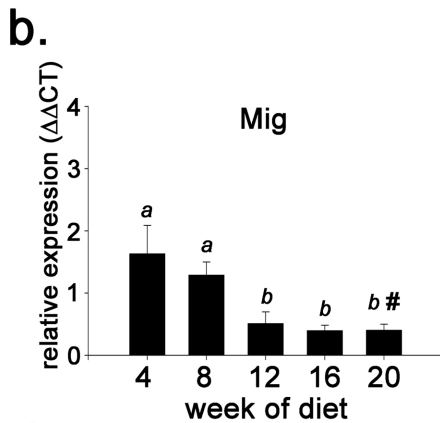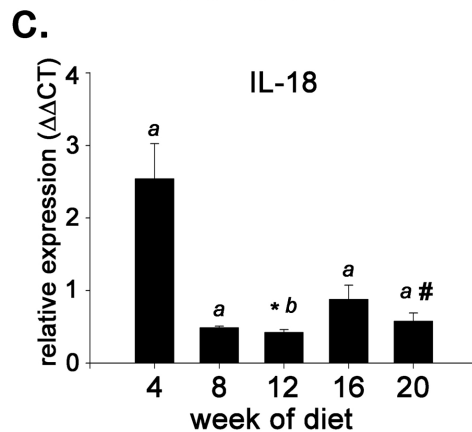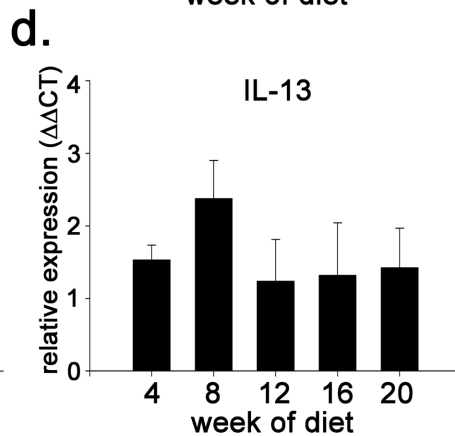

Supplement: NIHMS173148-supplement-supplment.pdf [file NIHMS173148-supplement-supplment.pdf]
